# Supplementary material
Source: PubMed Central journal article supplement (PMC5788733)
Supplement: NIHMS896112-supplement-Supp_info.pdf [file NIHMS896112-supplement-Supp_info.pdf]

## Online supplemental file 1

### Connexin-43 and Aquaporin-4 are markers of ARTAG-related astroglial response

Gabor G. Kovacs<sup>1,2</sup>†, Ahmed Yousef<sup>2</sup>†, Sabine Kaindl<sup>1</sup>, Virginia M. Lee<sup>2</sup>, John Q. Trojanowski<sup>2</sup>

1: Institute of Neurology, Medical University of Vienna, Vienna, Austria; 2: Center for Neurodegenerative Disease Research, Institute on Aging and Department of Pathology and Laboratory Medicine of the Perelman School of Medicine at the University of Pennsylvania; Philadelphia, PA, USA;

---

Immunostaining for Connexin-43 (Cx43) in brain sections showing prominent reactive astrogliosis.

We examined the following cases:

| Case Nr | Age (years) | Gender | Neuropathology                             | Region      |
|---------|-------------|--------|--------------------------------------------|-------------|
| 1       | 51          | female | Chronic Ischemic/hypoxic panencephalopathy | Hippocampus |
| 2       | 65          | male   | Chronic Ischemic/hypoxic panencephalopathy | Hippocampus |
| 3       | 38          | male   | Chronic Ischemic/hypoxic panencephalopathy | Hippocampus |
| 4       | 52          | male   | Creutzfeldt-Jakob disease                  | Frontal     |
| 5       | 60          | female | Creutzfeldt-Jakob disease                  | Thalamus    |
| 6       | 60          | female | Creutzfeldt-Jakob disease                  | Frontal     |

**Case 1:** Cx43 does not show enhanced immunoreactivity in reactive astrocytes but the physiological staining (arrowheads) was recognized in a few astrocytes (magnification: x200).

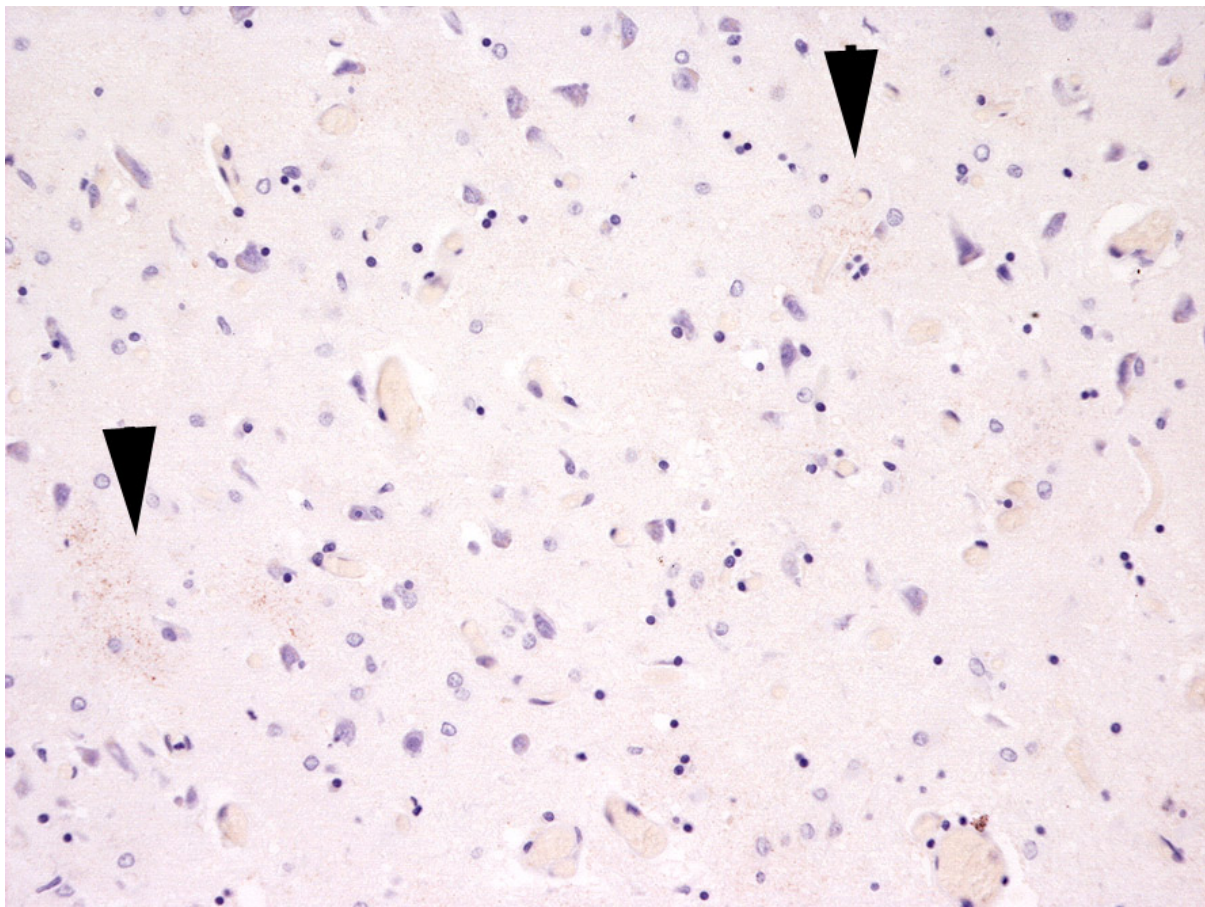

## Online supplemental file 1

### Connexin-43 and Aquaporin-4 are markers of ARTAG-related astroglial response

Gabor G. Kovacs<sup>1,2</sup>, Ahmed Yousef<sup>2</sup>, Sabine Kaindl<sup>1</sup>, Virginia M. Lee<sup>2</sup>, John Q. Trojanowski<sup>2</sup>

1: Institute of Neurology, Medical University of Vienna, Vienna, Austria; 2: Center for Neurodegenerative Disease Research, Institute on Aging and Department of Pathology and Laboratory Medicine of the Perelman School of Medicine at the University of Pennsylvania; Philadelphia, PA, USA;

---

**Case 2:** Cx43 does not show enhanced immunoreactivity in reactive astrocytes but the physiological staining (arrowhead) was recognized in a few astrocytes (magnification: x200).

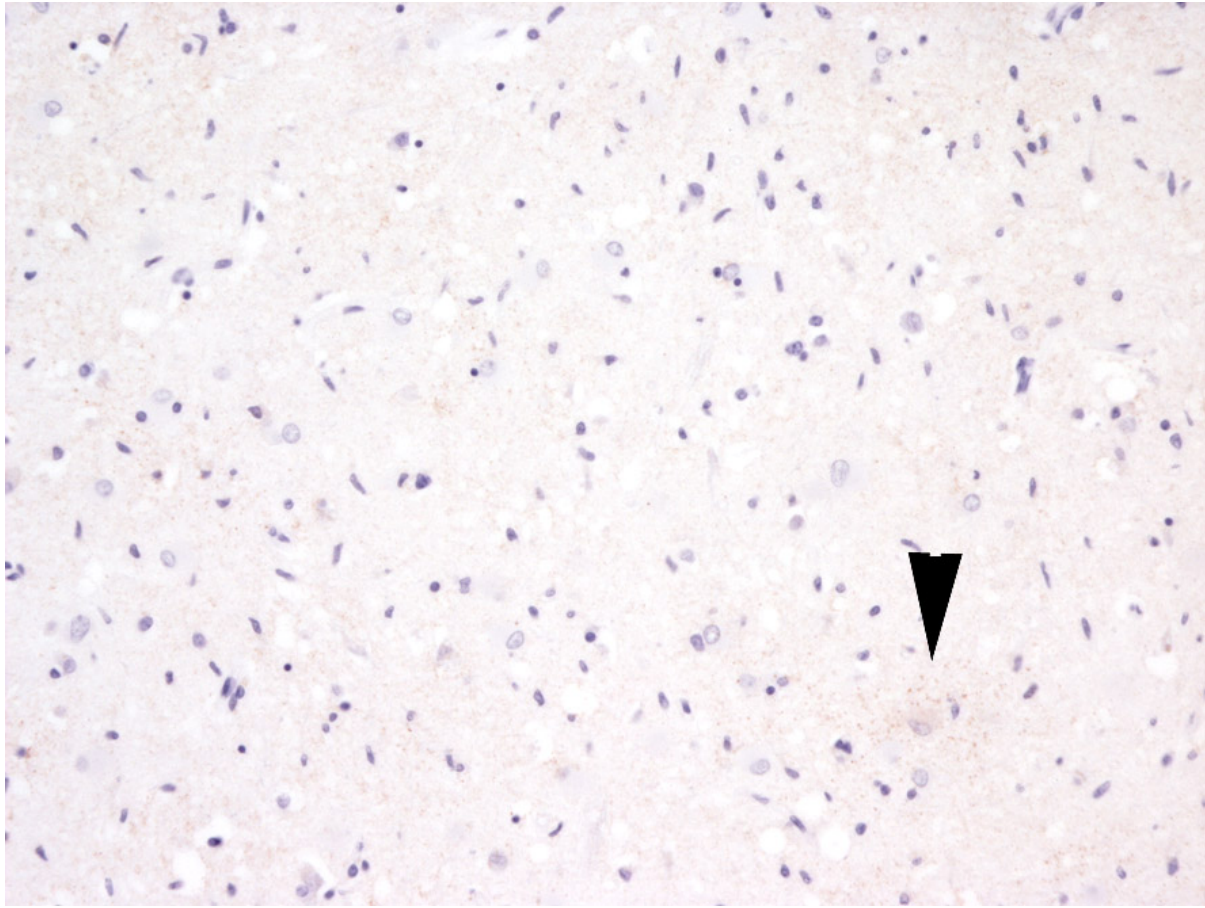

In the same case, the enlarged image of a reactive astrocyte (left side of image) shows a lack of prominent Cx43 immunoreactivity, but subependymal astrocytes (right side of image) show physiological strong immunoreactivity.

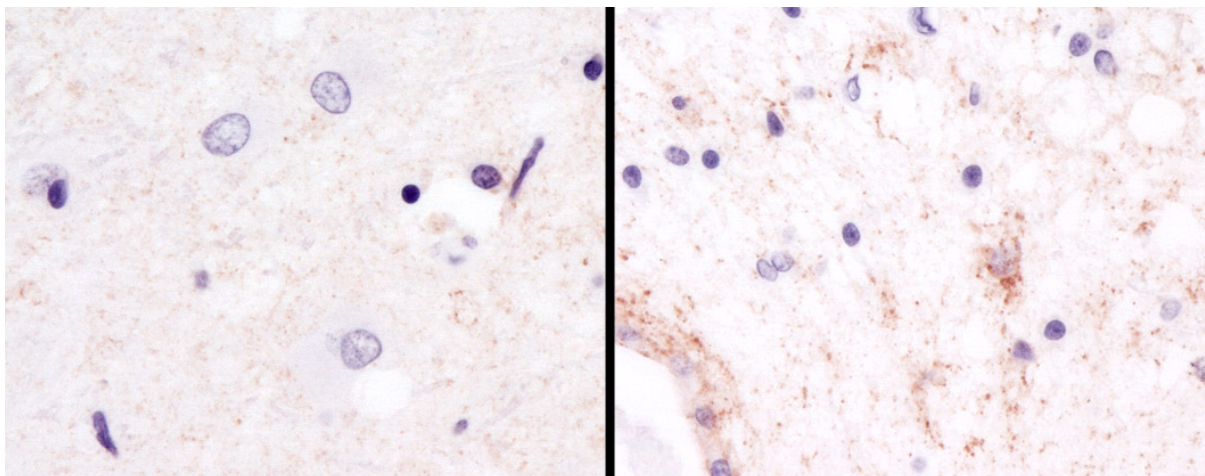

### **Online supplemental file 1**

#### **Connexin-43 and Aquaporin-4 are markers of ARTAG-related astroglial response**

Gabor G. Kovacs<sup>1,2</sup>†, Ahmed Yousef<sup>2</sup>†, Sabine Kaindl<sup>1</sup>, Virginia M. Lee<sup>2</sup>, John Q. Trojanowski<sup>2</sup>

1: Institute of Neurology, Medical University of Vienna, Vienna, Austria; 2: Center for Neurodegenerative Disease Research, Institute on Aging and Department of Pathology and Laboratory Medicine of the Perelman School of Medicine at the University of Pennsylvania; Philadelphia, PA, USA;

---

**Case 3:** Cx43 does not show enhanced immunoreactivity in reactive astrocytes but the physiological staining (arrowheads) was recognized in a few astrocytes (magnification: x200).

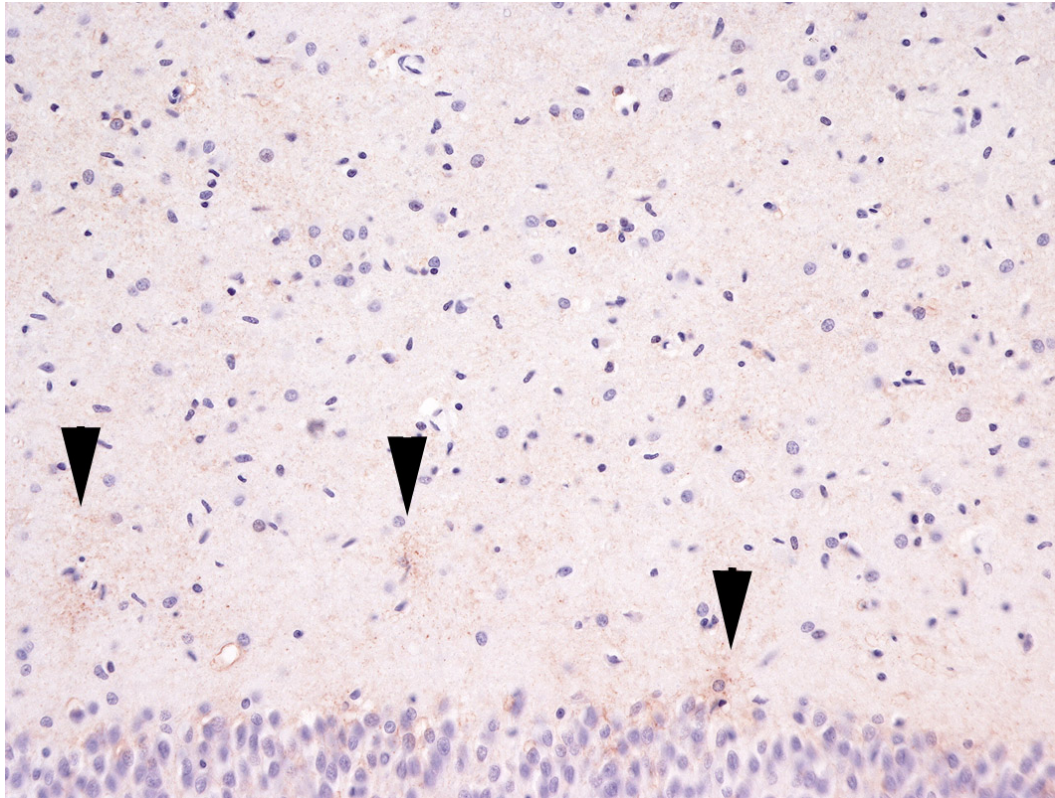

**Case 4:** Cx43 does not show enhanced immunoreactivity in reactive astrocytes (magnification: x200).

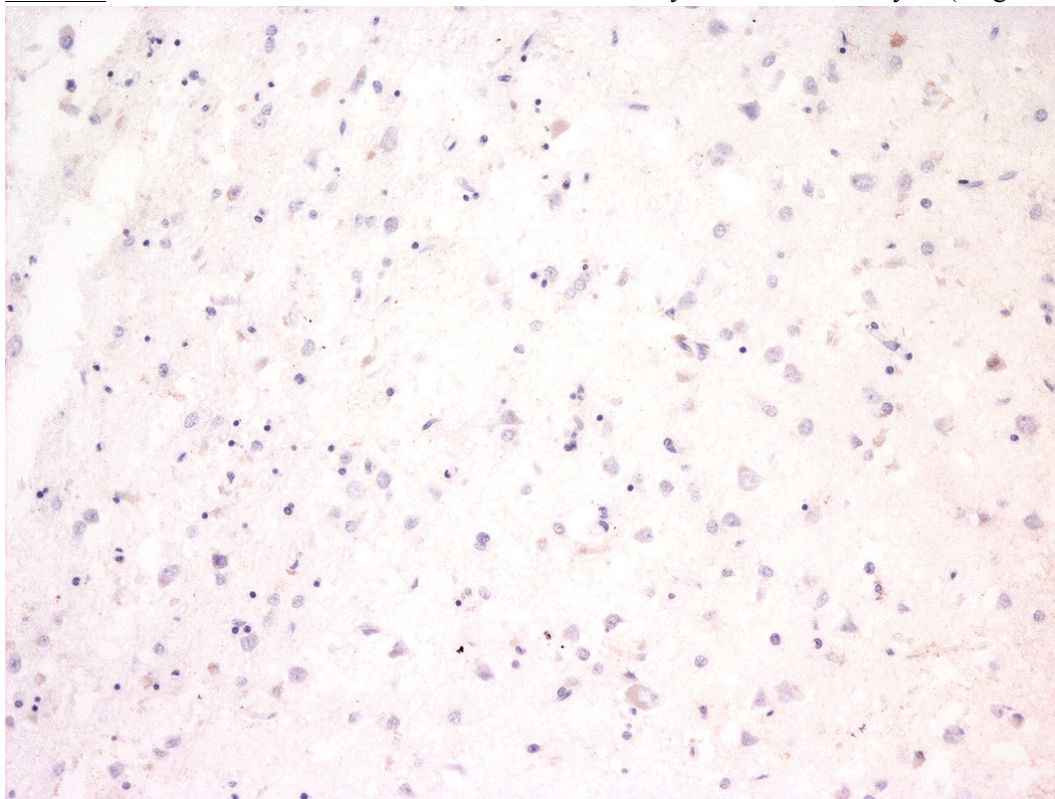

## Online supplemental file 1

### Connexin-43 and Aquaporin-4 are markers of ARTAG-related astroglial response

Gabor G. Kovacs<sup>1,2</sup>\*, Ahmed Yousef<sup>2</sup>\*, Sabine Kaindl<sup>1</sup>, Virginia M. Lee<sup>2</sup>, John Q. Trojanowski<sup>2</sup>

1: Institute of Neurology, Medical University of Vienna, Vienna, Austria; 2: Center for Neurodegenerative Disease Research, Institute on Aging and Department of Pathology and Laboratory Medicine of the Perelman School of Medicine at the University of Pennsylvania; Philadelphia, PA, USA;

---

**Case 5:** Cx43 does not show enhanced immunoreactivity in reactive astrocytes (magnification: x200).

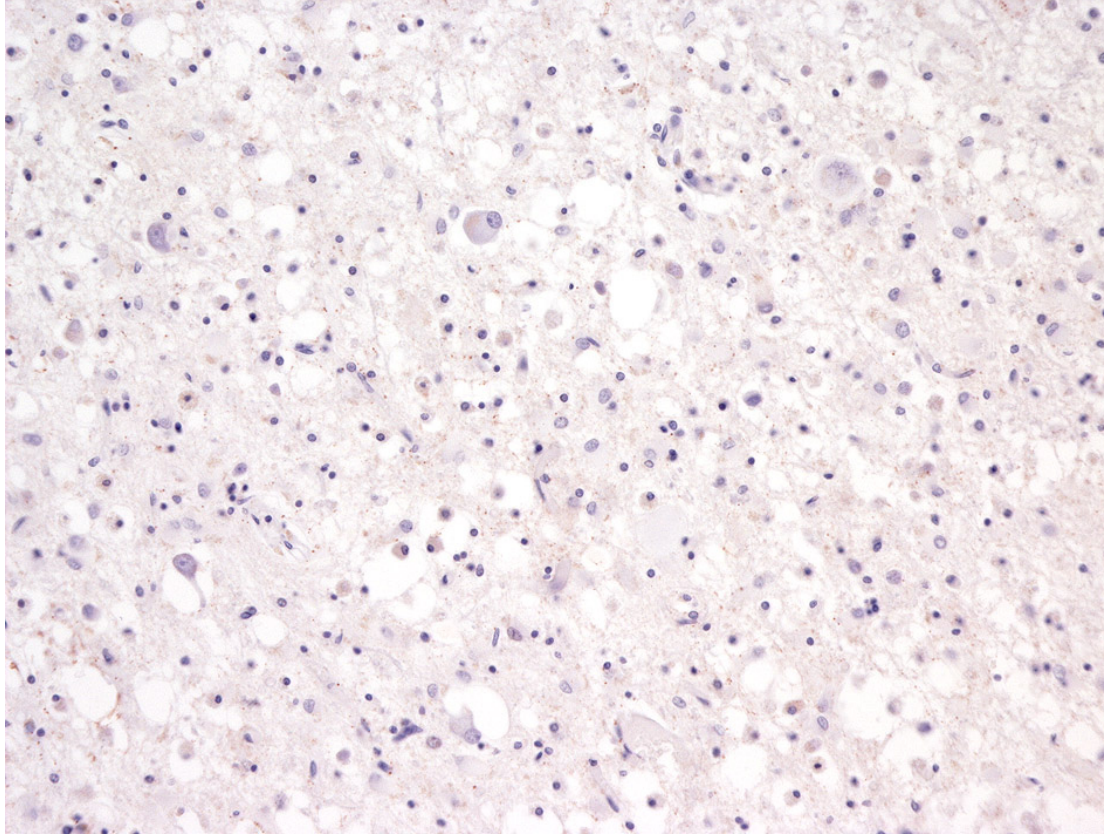

In the same case, the enlarged image of a reactive astrocyte (left side of image) lack prominent Cx43 immunoreactivity, but subpial astrocytes (right side of image) show physiological strong immunoreactivity.

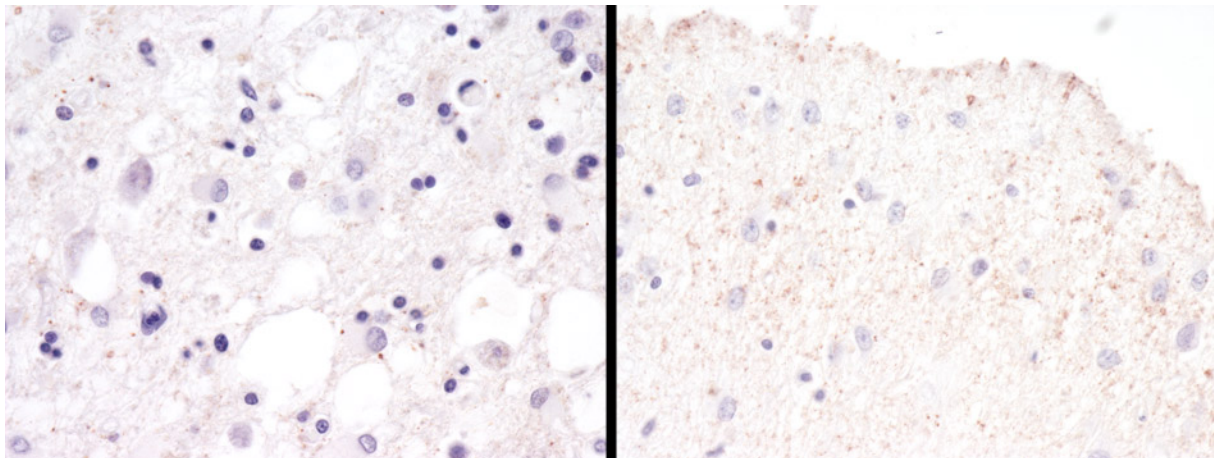

## **Online supplemental file 1**

### **Connexin-43 and Aquaporin-4 are markers of ARTAG-related astroglial response**

Gabor G. Kovacs<sup>1,2</sup>†, Ahmed Yousef<sup>2</sup>†, Sabine Kaindl<sup>1</sup>, Virginia M. Lee<sup>2</sup>, John Q. Trojanowski<sup>2</sup>

1: Institute of Neurology, Medical University of Vienna, Vienna, Austria; 2: Center for Neurodegenerative Disease Research, Institute on Aging and Department of Pathology and Laboratory Medicine of the Perelman School of Medicine at the University of Pennsylvania; Philadelphia, PA, USA;

---

**Case 6:** Cx43 does not show enhanced immunoreactivity in reactive astrocytes (magnification: x200).

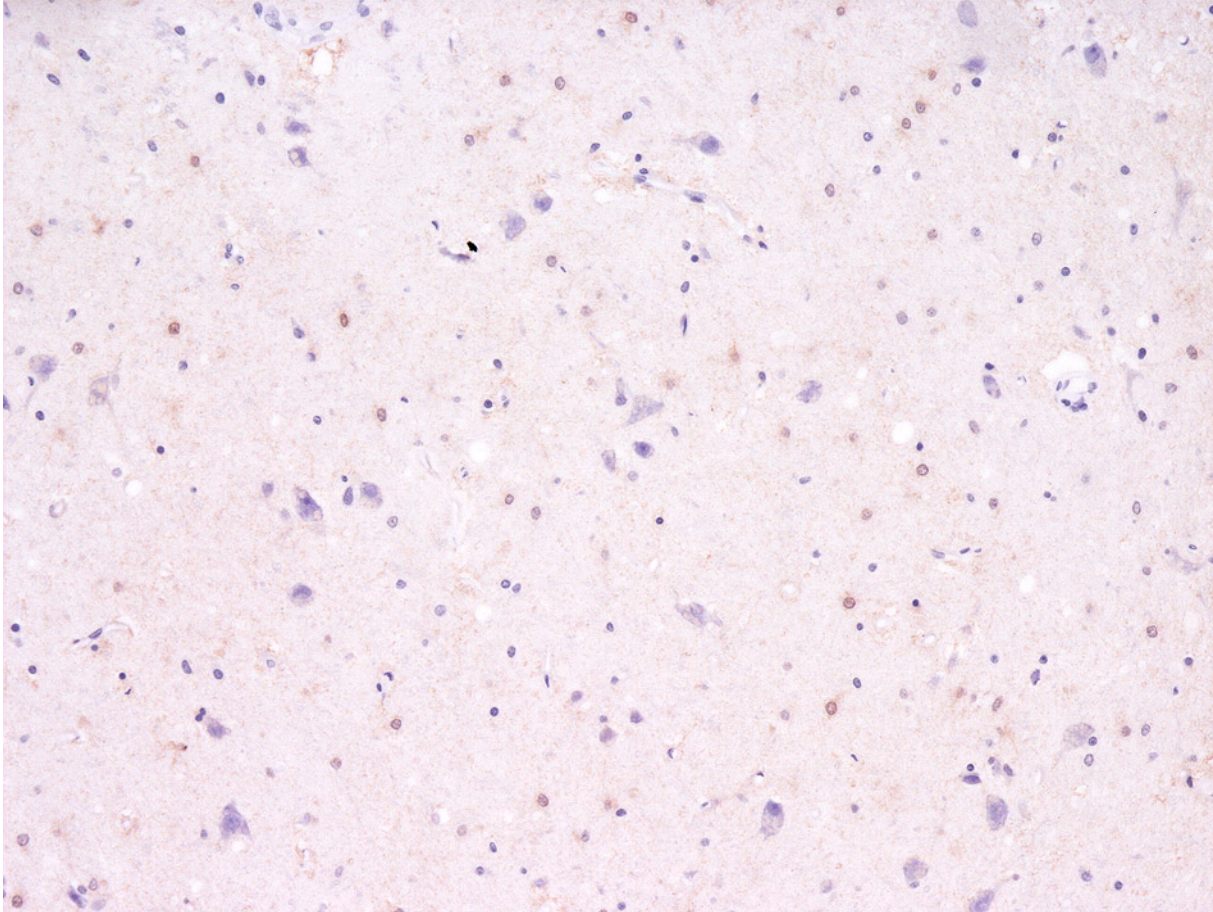

### **Conclusion:**

Increased Cx43 immunoreactivity is not due to pure reactive astrogliosis. We conclude that in ARTAG the increased Cx43 density of immunoreactivity is most likely associated with further pathogenic events.
